# Supplementary material for: Solvent-directed femtosecond laser ablation: tuning phase and defect engineering in hybrid CdPS3/CdS nanostructures
Source: Royal Society of Chemistry journal article supplement (doi:10.1039/d6na00119j), 2026-06-17
Supplement: d6na00119j1.pdf [file d6na00119j1.pdf]

Supporting Information for

## Solvent-Directed Femtosecond Laser Ablation: Tuning Phase and Defect Engineering in Hybrid CdPS<sub>3</sub>/CdS Nanostructures

| Compound<br>Solvent | CdPS <sub>3</sub> (C2/m) |                      |                      | CdS (P6 <sub>3</sub> mc, Wurtzite) |                      |                      |
|---------------------|--------------------------|----------------------|----------------------|------------------------------------|----------------------|----------------------|
|                     | hkl                      | d <sub>exp</sub> , Å | d <sub>hkl</sub> , Å | hkl                                | d <sub>exp</sub> , Å | d <sub>hkl</sub> , Å |
| DI water            | 1 1 -2                   | 3.30                 | 3.24                 |                                    |                      |                      |
|                     | 0 3 0                    | 3.10                 | 3.09                 |                                    |                      |                      |
|                     | 1 3 -2                   | 2.46                 | 2.47                 |                                    |                      |                      |
|                     | 0 2 3                    | 2.04                 | 2.09                 |                                    |                      |                      |
|                     | 0 6 0                    | 1.78                 | 1.81                 |                                    |                      |                      |
|                     | 0 0 4                    | 1.73                 | 1.70                 |                                    |                      |                      |
|                     |                          | 0 2 2                | 2.90                 | 2.88                               | 1 0 0                | 3.62                 |
| ACN                 | 1 3 1                    | 2.65                 | 2.67                 | 1 0 1                              | 3.17                 | 3.19                 |
|                     | 0 2 3                    | 2.08                 | 2.09                 | 0 1 3                              | 1.90                 | 1.92                 |
|                     | 1 3 -3                   | 1.96                 | 1.97                 | 1 1 2                              | 1.77                 | 1.78                 |
|                     | 0 6 0                    | 1.77                 | 1.81                 | 1 2 3                              | 1.15                 | 1.17                 |
|                     | 1 3 1                    | 2.63                 | 2.67                 | 1 0 0                              | 3.59                 | 3.61                 |
|                     | 1 3 -2                   | 2.44                 | 2.47                 | 1 0 1                              | 3.17                 | 3.19                 |
| IPA                 | 0 2 3                    | 2.10                 | 2.09                 | 1 0 2                              | 2.44                 | 2.47                 |
|                     | 0 6 0                    | 1.77                 | 1.81                 | 0 1 3                              | 1.90                 | 1.92                 |
|                     |                          |                      |                      | 1 1 2                              | 1.77                 | 1.78                 |
|                     |                          |                      |                      |                                    |                      |                      |

**Supplementary Table S1.** Interplanar spacings  $d_{\text{exp}}$  and calculated  $d_{\text{hkl}}$  distances determined from SAED patterns in Figs.2d,e,f of the main text.

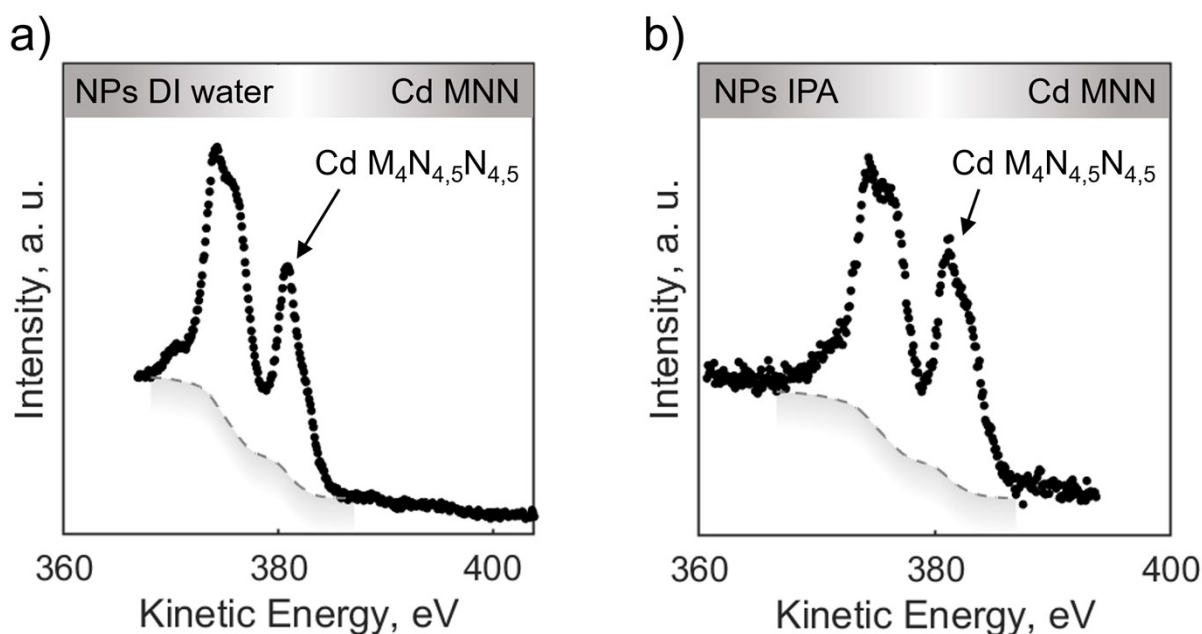

**Supplementary Figure S1.** Measured XAES spectra Cd MNN for PLAL-produced samples in a) DI water and b) IPA. Shirley baselines denoted as dashed lines are used for the whole Cd MNN spectra.

| Compound              | Cd $3d_{5/2}$<br>Binding Energy, eV | Cd $M_4N_{4,5}N_{4,5}$<br>Kinetic Energy, eV | Reference  |
|-----------------------|-------------------------------------|----------------------------------------------|------------|
| CdPS3                 | 405.6                               | 380.8                                        | [S1]       |
| CdS                   | 405.3                               | 381.3                                        | [S1]       |
| CdO                   | 405.2                               | 382.2                                        | [S2]       |
| Cd                    | 405                                 | 384                                          | [S1]       |
| NPs in DI water       | 405.71                              | 380.89                                       | This study |
| NPs in IPA            | 405.46                              | 381.15                                       | This study |
| Cd <sup>0</sup> sites | 405.46                              | 383.19                                       | This study |

**Supplementary Table S2.** Cd  $d_{3/2}$  core level binding energy positions and kinetic energies of the Cd  $M_4N_{4,5}N_{4,5}$  Auger transition in cadmium compounds.

## References

- [S1] Curró, G. M., Vincenzo Grasso, and Letteria Silipigni. "X-ray photoelectron spectroscopy of CdPS3." *Journal of applied physics* 84.12 (1998): 6693-6697.
- [S2] Chastain, Jill, and Roger C. King Jr. "Handbook of X-ray photoelectron spectroscopy." Perkin-Elmer Corporation 40.221 (1992): 25.
